# Supplementary material
Source: PubMed Central journal article supplement (PMC4716617)
Supplement: cmi2014108x1.pdf [file cmi2014108x1.pdf]

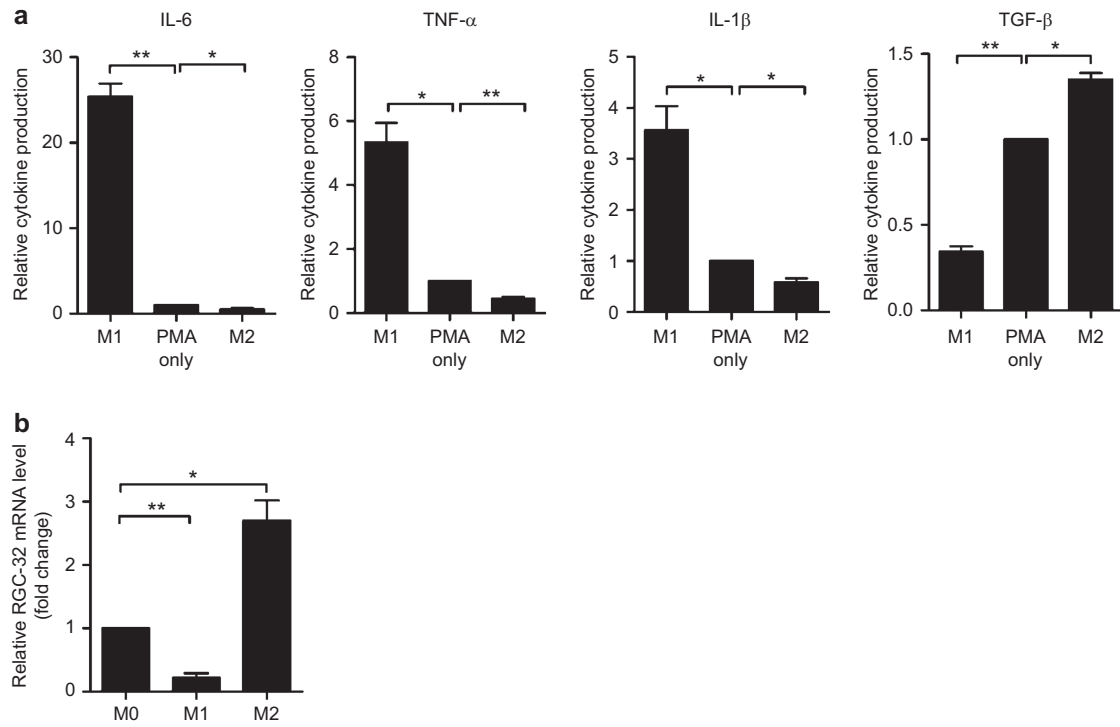

**Supplementary Figure 1** Macrophages were polarized towards M1 or M2 using LPS plus IFN- $\gamma$  or IL-4, respectively. M1/M2-polarized THP-1 macrophages were generated as described in the section on 'Materials and methods'. **(a)** The cell-free culture supernatants were collected and analyzed for IL-6, IL-1 $\beta$ , TNF- $\alpha$  and TGF- $\beta$  using ELISA. **(b)** RGC-32 expression was determined by quantitative RT-PCR in M1 and M2 macrophages. The graphs are representative of three separate experiments. \* $P$ <0.05, \*\* $P$ <0.01.
